# Supplementary material
Source: publisher figshare collection journal article supplement (https://acs.figshare.com/ndownloader/files/5176897)

MAR 19 2004

**REVISED**

**Supporting Information**

**Novel Borane Reduction of Ether-Protected Aromatic Lactams**

Wan-Ping Hu,<sup>a</sup> Pei-Ching Tsai,<sup>b</sup> Ming-Kuan Hsu,<sup>b</sup> and Jeh-Jeng Wang<sup>\*a,b</sup>

<sup>a</sup>*Faculty of Biotechnology, <sup>b</sup>Faculty of Medicinal and Applied Chemistry, Kaohsiung Medical University, Kaohsiung City 807, Taiwan*

**Table of contents:**

|                                 |     |
|---------------------------------|-----|
| General procedure               | S2  |
| <sup>1</sup> H NMR of <b>5</b>  | S5  |
| <sup>1</sup> H NMR of <b>6a</b> | S6  |
| DEPT of <b>6a</b>               | S7  |
| <sup>1</sup> H NMR of <b>6b</b> | S8  |
| DEPT of <b>6b</b>               | S9  |
| <sup>1</sup> H NMR of <b>10</b> | S10 |
| Low Mass of <b>10</b>           | S11 |
| High Mass of <b>10</b>          | S12 |

## EXPERIMENTAL SECTION

IR spectra were obtained on a FT-IR spectrometer as neat.  $^1\text{H}$  NMR spectra were recorded at 400 or 200 MHz.  $^{13}\text{C}$  NMR spectra were recorded at 100 MHz, using  $\text{CDCl}_3$  as a solvent.  $^1\text{H}$  NMR chemical shifts are referenced to TMS or  $\text{CDCl}_3$  (7.26 ppm).  $^{13}\text{C}$  NMR was referenced to  $\text{CDCl}_3$  (77.0 ppm). Multiplicities were determined by the DEPT sequence as s, d, t, q. Mass spectra and high resolution mass spectra (HRMS) were measured using the electron-impact (EI, 70 eV) technique by Taichung Regional Instrument Center of National Science Council at National Chung-Hsiung University. Flash chromatography was carried out on 230-400 mesh of Silica Gel.

### **General procedure for boranes reduction of ether protected 3,4-dihydro-2(1H)-quinolinones (4).**

*Reaction condition a:* To a stirred solution of ether protected lactam **4a-h** (0.2 mmol) in THF (5 mL) was added 15 equiv of borane-tetrahydrofuran (3 mL, 1M in THF) under nitrogen at room temperature, then the mixture was stirred at the room temperature for 24h. The reaction mixture was poured into ice water (100 mL) and extracted four times with ethyl acetate. The combined organic phases were washed with saturated  $\text{NaHCO}_3$ ,  $\text{H}_2\text{O}$ , brine, and dried over  $\text{MgSO}_4$ . After removal of solvent, the residue was purified by flash chromatography (hexane/ $\text{AcOEt}$  = 50:1) to give the corresponding compounds **5**, **6a** or **6b**. The reaction yields are shown in Table 1.

*Reaction condition b:* To a stirred solution of ether protected lactam **4a-h** (0.2 mmol) in THF (5 mL) was added borane-dimethyl sulfide (307  $\mu\text{L}$ , 10 M) under nitrogen at room temperature, then the mixture was stirred at the room temperature for

24h. The reaction mixture was poured into ice water (100 mL) and extracted four times with ethyl acetate. The combined organic phases were washed with saturated  $\text{NaHCO}_3$ ,  $\text{H}_2\text{O}$ , brine, and dried over  $\text{MgSO}_4$ . After removal of solvent, the residue was purified by flash chromatography (hexane/ $\text{AcOEt}$  = 50:1) to give the corresponding compounds **5**, **6a** or **6b**. The reaction yields are shown in Table 1.

**1-Methyl-1,2,3,4-tetrahydroquinoline (5).**<sup>1</sup> colorless oil;  $^1\text{H}$  NMR ( $\text{CDCl}_3$ , 400 MHz)  $\delta$  7.15 (td,  $J$  = 7.6, 1.4 Hz, 1H), 7.02 (dd,  $J$  = 7.2, 1.2 Hz, 1H), 6.68 (t,  $J$  = 7.6 Hz, 2H), 3.28 (t,  $J$  = 5.6 Hz, 2H), 2.95(s,  $J$  = 6.4 Hz, 3H), 2.84 (t,  $J$  = 6.4 Hz, 2H), 2.08-2.02 (m, 2H).

**4-(3,4-Dihydro-2H-quinolin-1-yl)-butan-1-ol (6a).** yellow oil;  $^1\text{H}$  NMR ( $\text{CDCl}_3$ , 400 MHz)  $\delta$  7.03 (td,  $J$  = 7.2, 2.0 Hz, 1H), 6.93 (dd,  $J$  = 7.2, 1.2 Hz, 1H), 6.57 (d,  $J$  = 8.4 Hz, 1H), 6.55 (td,  $J$  = 7.6, 0.8 Hz, 1H), 3.66 (t,  $J$  = 6.4 Hz, 2H), 3.28-3.25 (m, 4H), 2.74 (t,  $J$  = 6.4 Hz, 2H), 1.97-1.91 (m, 2H), 1.71-1.57 (m, 4H);  $^{13}\text{C}$  NMR ( $\text{CDCl}_3$ , 100 MHz)  $\delta$  145.3 (s), 129.1 (d), 127.0 (d), 122.4 (s), 115.5 (d), 110.6 (d), 62.8 (t), 51.4 (t), 49.5 (t), 30.4 (t), 28.1 (t), 22.8 (t), 22.2 (t); IR (neat) 3367, 2947, 2837, 1596, 754  $\text{cm}^{-1}$ ; LRMS (EI,  $m/z$ ) 205 ( $\text{M}^+$ ); HRMS (EI,  $m/z$ ) for  $\text{C}_{13}\text{H}_{19}\text{NO}$ , calcd 205.1468, found 205.1474.

**4-(3,4-Dihydro-2H-quinolin-1-yl)-butane-1-thiol (6b).** yellow oil;  $^1\text{H}$  NMR ( $\text{CDCl}_3$ , 400 MHz)  $\delta$  7.03 (td,  $J$  = 8.0, 1.6 Hz, 1H), 6.93 (dd,  $J$  = 7.6, 0.8 Hz, 1H), 6.56-6.53 (m, 2H), 3.28-3.23 (m, 4H), 2.76-2.68 (m, 2H), 2.59-2.54 (m, 2H),

<sup>1</sup> Shaffer, C. L.; Morton, M. D.; Hanzilk, R. P. *J. Am. Chem. Soc.* **2001**, *123*, 8502.

129.2 (d), 127.0 (d), 122.3 (s), 115.4 (d), 110.4 (d), 50.9 (t), 49.5 (t), 31.7 (t), 28.1 (t), 25.2 (t), 24.6 (t), 22.2 (t); IR (neat) 2930, 2857, 1604, 1507, 747  $\text{cm}^{-1}$ ; LRMS (EI,  $m/z$ ) 221( $M^+$ ); HRMS (EI,  $m/z$ ) for  $\text{C}_{13}\text{H}_{19}\text{NS}$ , calcd 221.1240, found 221.1234.

**Synthesis of 1-(ethoxymethyl)-1,2,3,4-tetrahydroquinoline (10).** To a stirred solution of 1,2,3,4-tetrahydroquinoline (5 g, 37.5 mmol) and sodium hydride (1.8 g, 56.25 mmol) in DMF (40 mL) was added slowly ethoxymethyl chloride (EOMCl) (5.38 mL, 56.3 mmol) at 0  $^{\circ}\text{C}$ . The resulting reaction mixture was stirred at room temperature for 1.5 h and then poured into ice-water (300 mL) and extracted with ether (4 X 150 mL). The combined organic layer was dried over sodium sulfate. After removal of solvent, the residue was distilled under reduced pressure to yield **10** (63%); b.p. 100  $^{\circ}\text{C}$  (2.5 mm).  $^1\text{H}$  NMR ( $\text{CDCl}_3$ , 200 MHz)  $\delta$  7.15-7.00 (m, 2H), 6.91 (d,  $J$  = 8.0 Hz, 1H), 6.72 (t,  $J$  = 7.0 Hz, 1H), 4.79 (s, 2H), 3.62-3.46 (m, 4H), 2.82 (t,  $J$  = 6.4 Hz, 2H), 2.061-1.94 (m, 2H), 1.28 (t,  $J$  = 7.0 Hz, 3H); LRMS (EI,  $m/z$ ) 191 ( $M^+$ ); HRMS (EI,  $m/z$ ) for  $\text{C}_{12}\text{H}_{17}\text{NO}$ , calcd 191.1311, found 191.1309.

**Borane reduction of 1-(ethoxymethyl)-1,2,3,4-tetrahydroquinoline (10) to 1-Methyl-1,2,3,4-tetrahydroquinoline (5).** To a stirred solution of compound **10** (38 mg, 0.2 mmol) in THF (5 mL) was added 1 equiv of borane-tetrahydrofuran (200  $\mu\text{L}$ , 1M in THF) under nitrogen at room temperature, then the mixture was stirred at the room temperature for 1 h. The reaction mixture was poured into ice water (100 mL) and extracted four times with ethyl acetate. The combined organic phases were washed with saturated  $\text{NaHCO}_3$ ,  $\text{H}_2\text{O}$ , brine, and dried over  $\text{MgSO}_4$ . After removal of solvent, the residue was purified by flash chromatography (hexane/AcOEt = 50:1) to give compound **5**: yield 27 mg (98%).

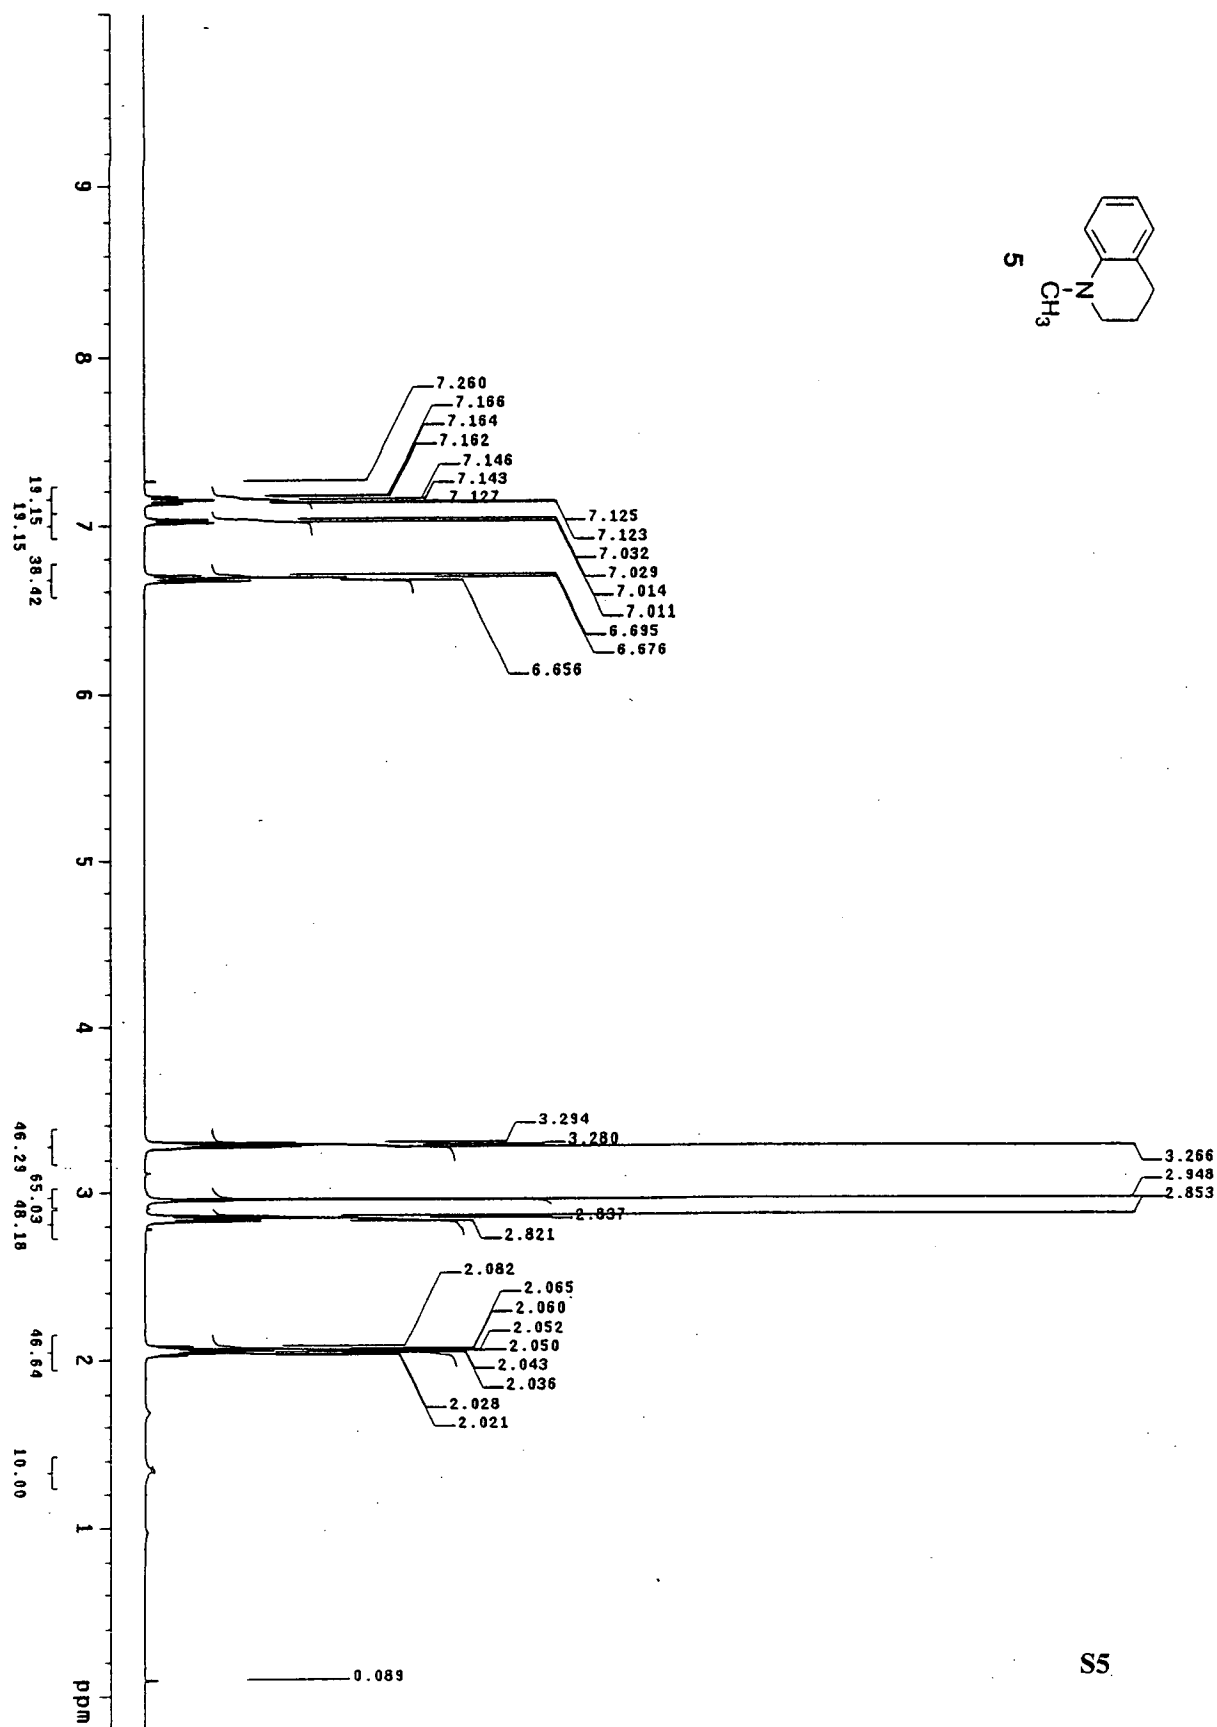

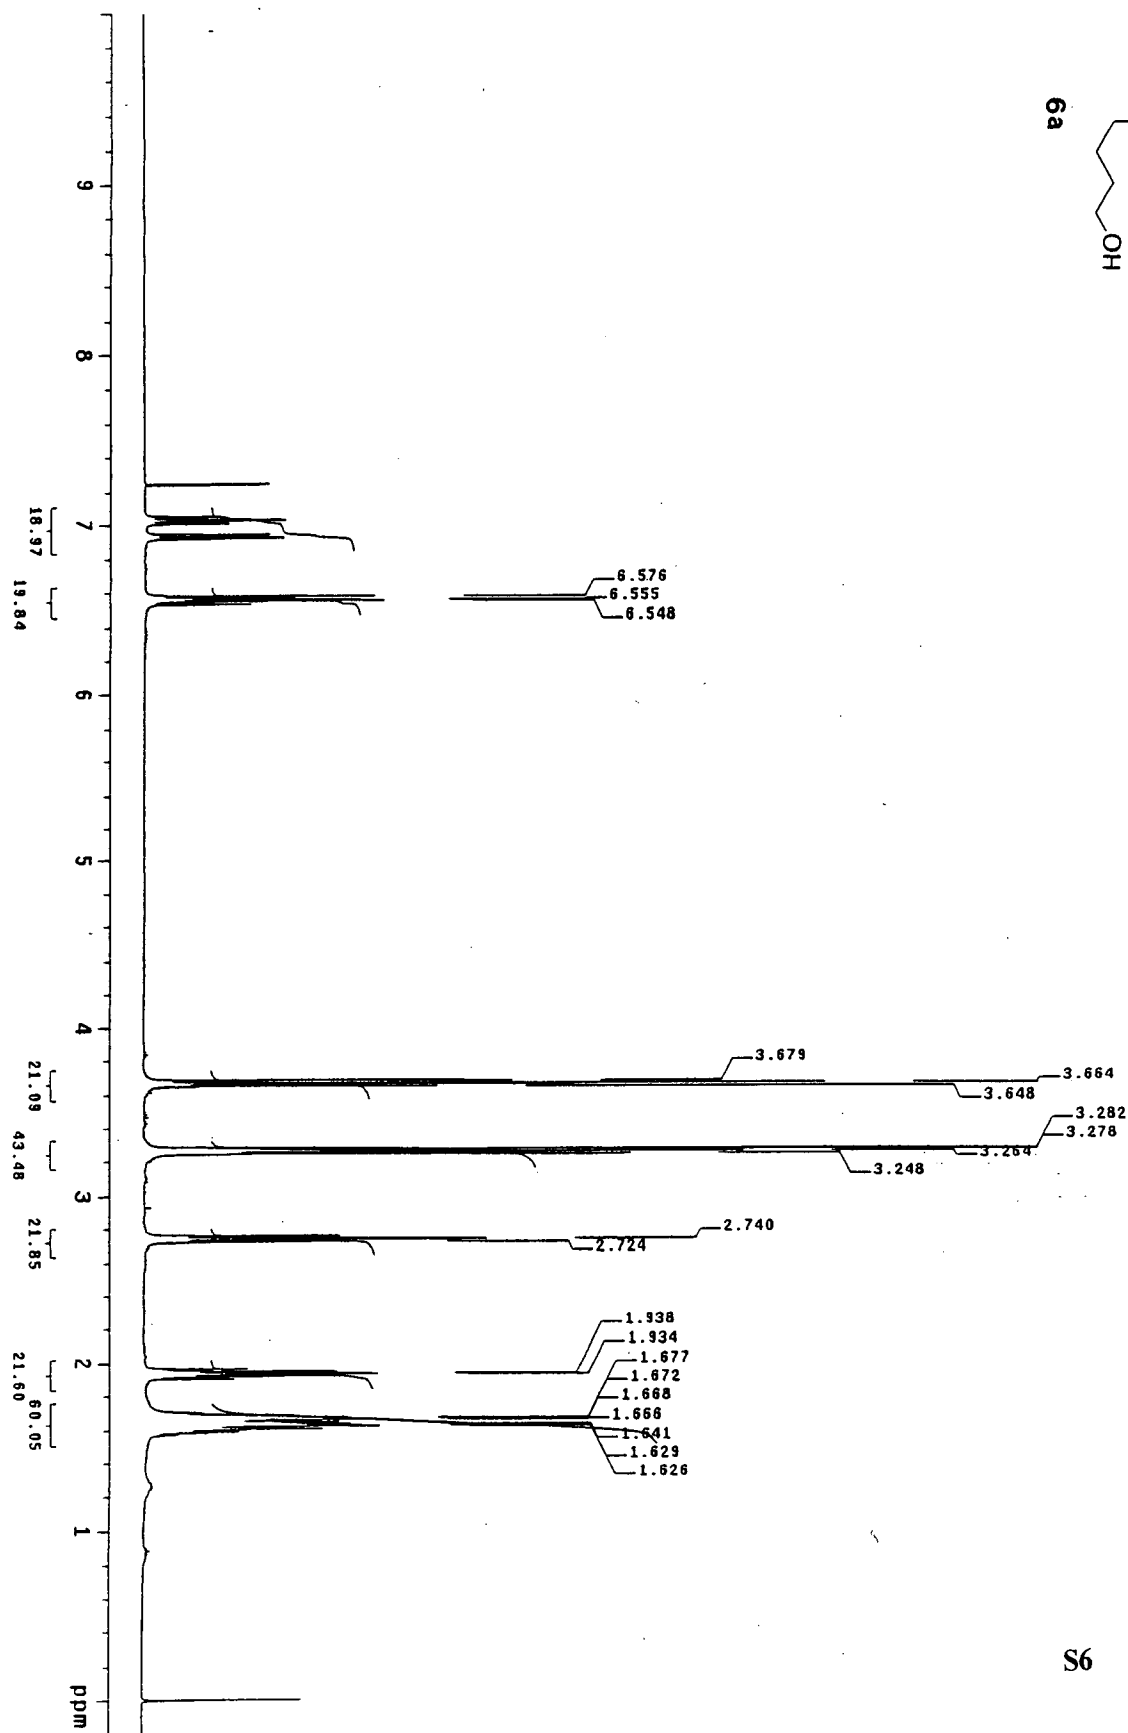

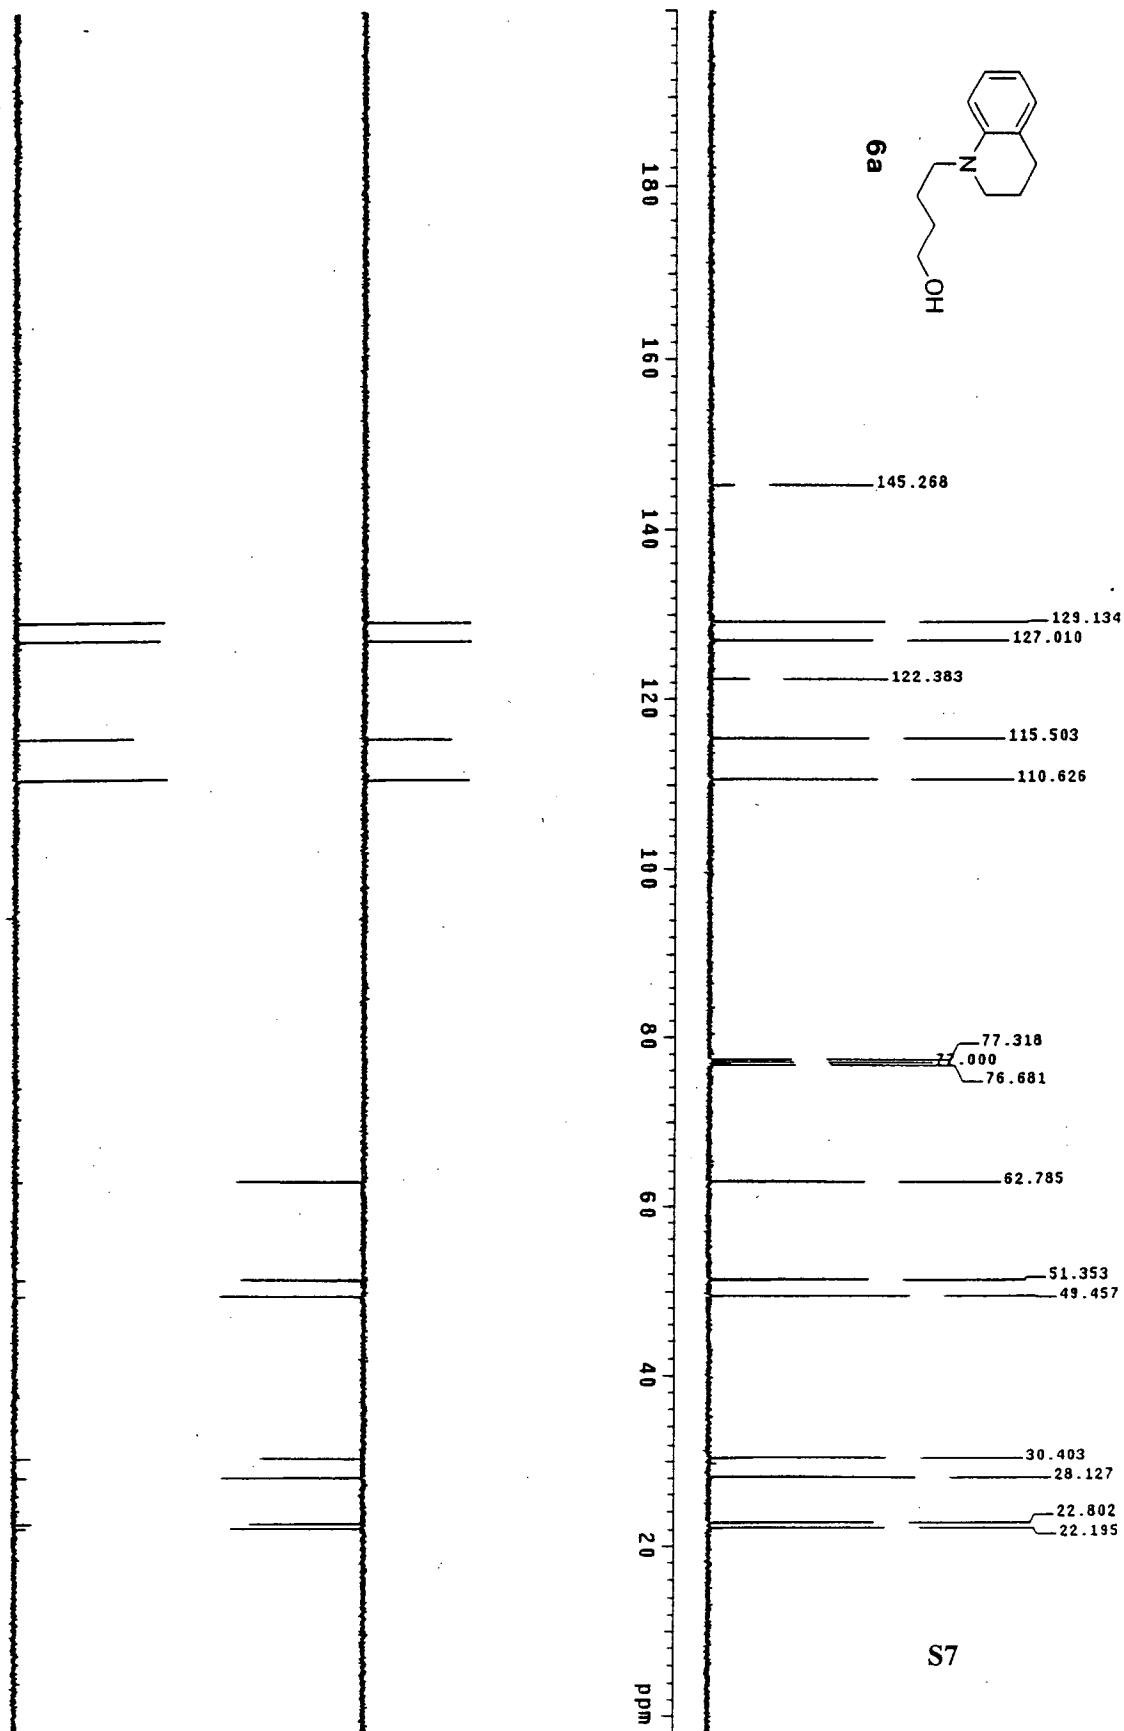

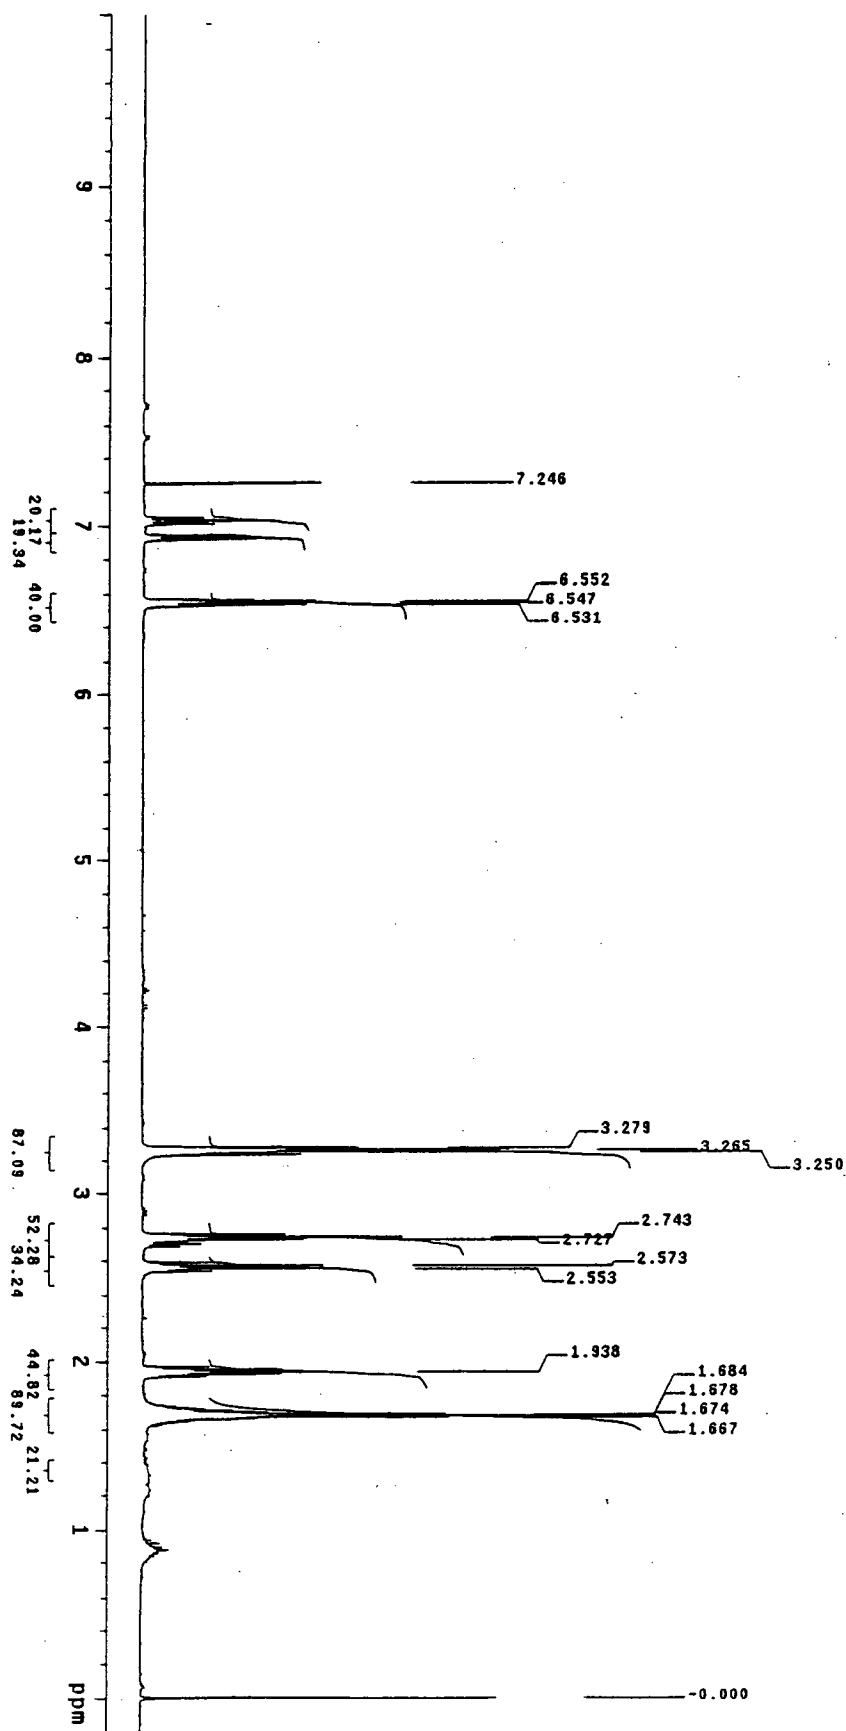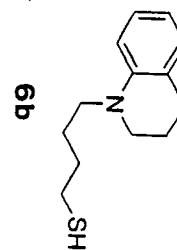



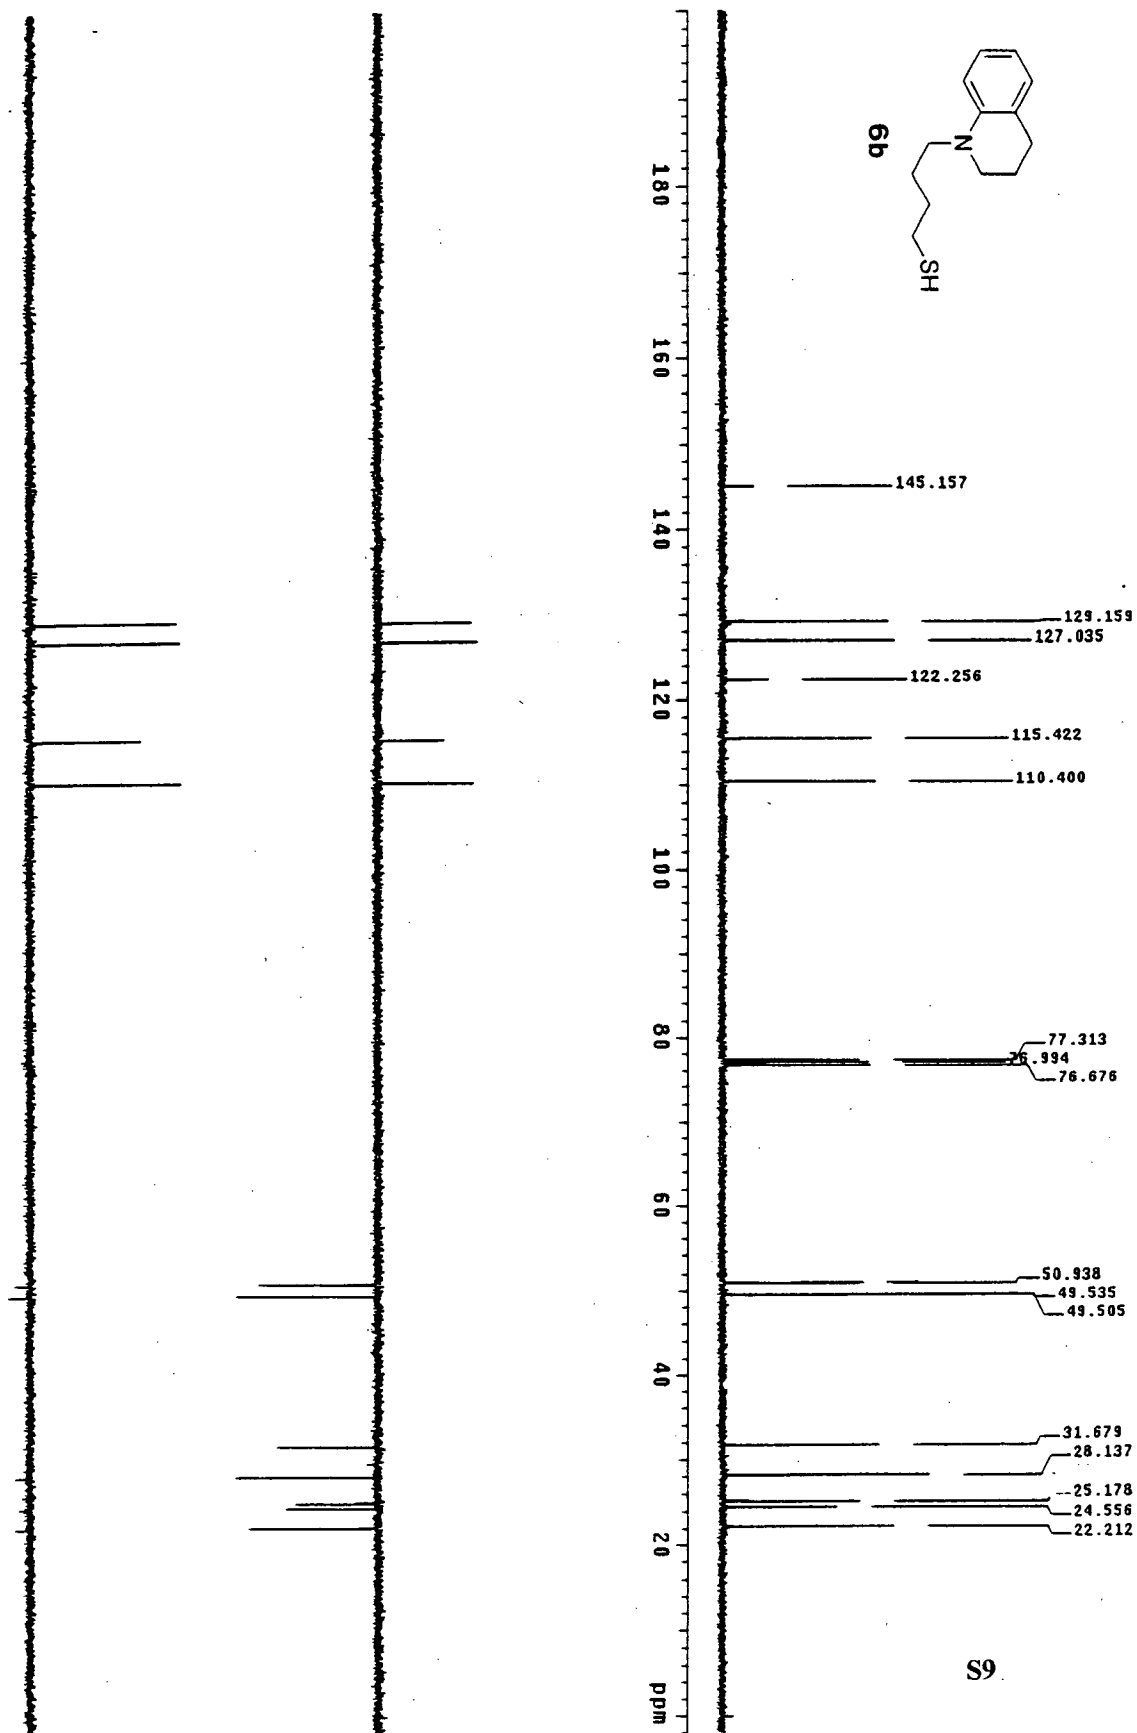

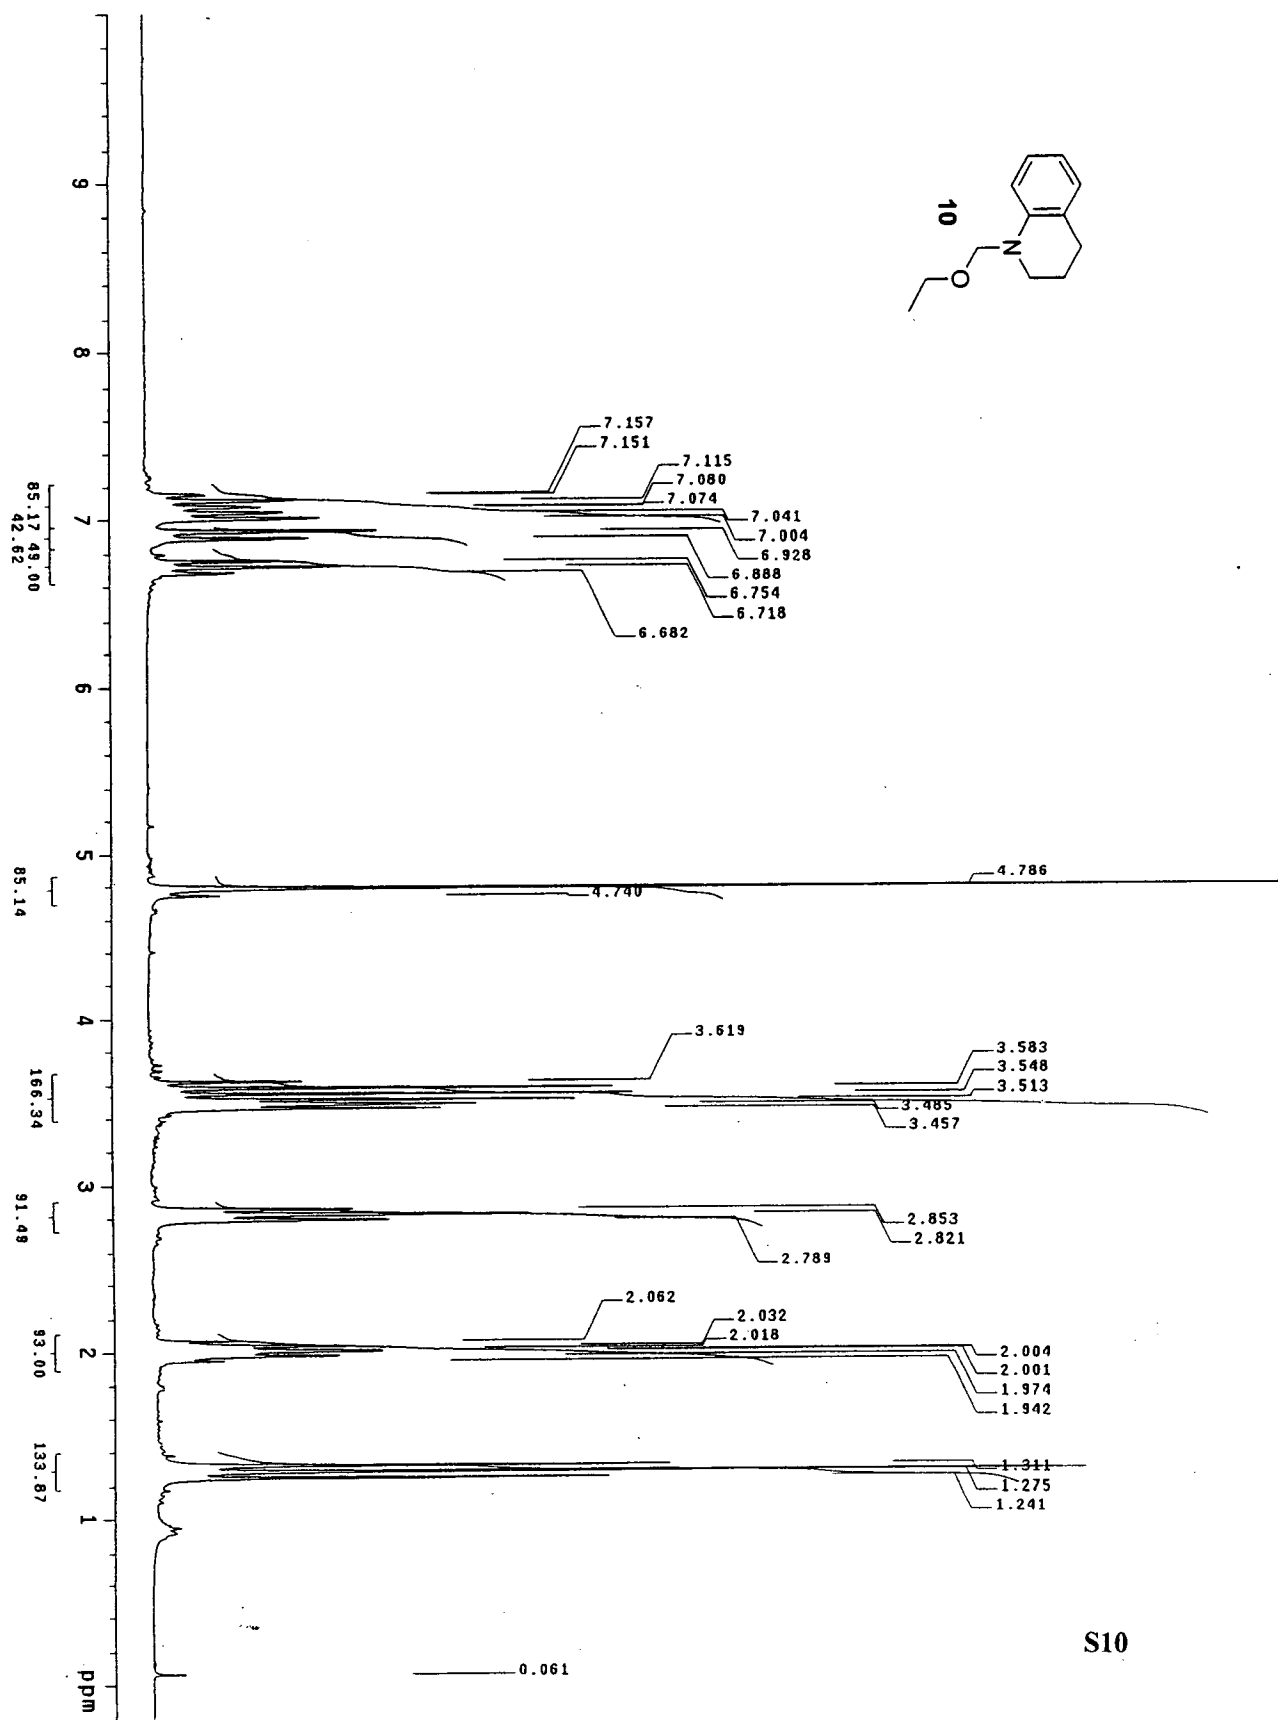

S10

SPEC: 1e1194  
Samp: EOM-THQ42  
Mode: EI +VE +LMR BSCAN (EXP) UP LR NRM  
Operator:  
Base: 146.3  
Norm: 146.3  
Peak: 1000.00  
Data: +/2>43

25-Feb-10  
REG : 00:03.8  
Start : 11:30:09  
#9

Inlet :  
Masses: 45 > 200  
#peaks: 157

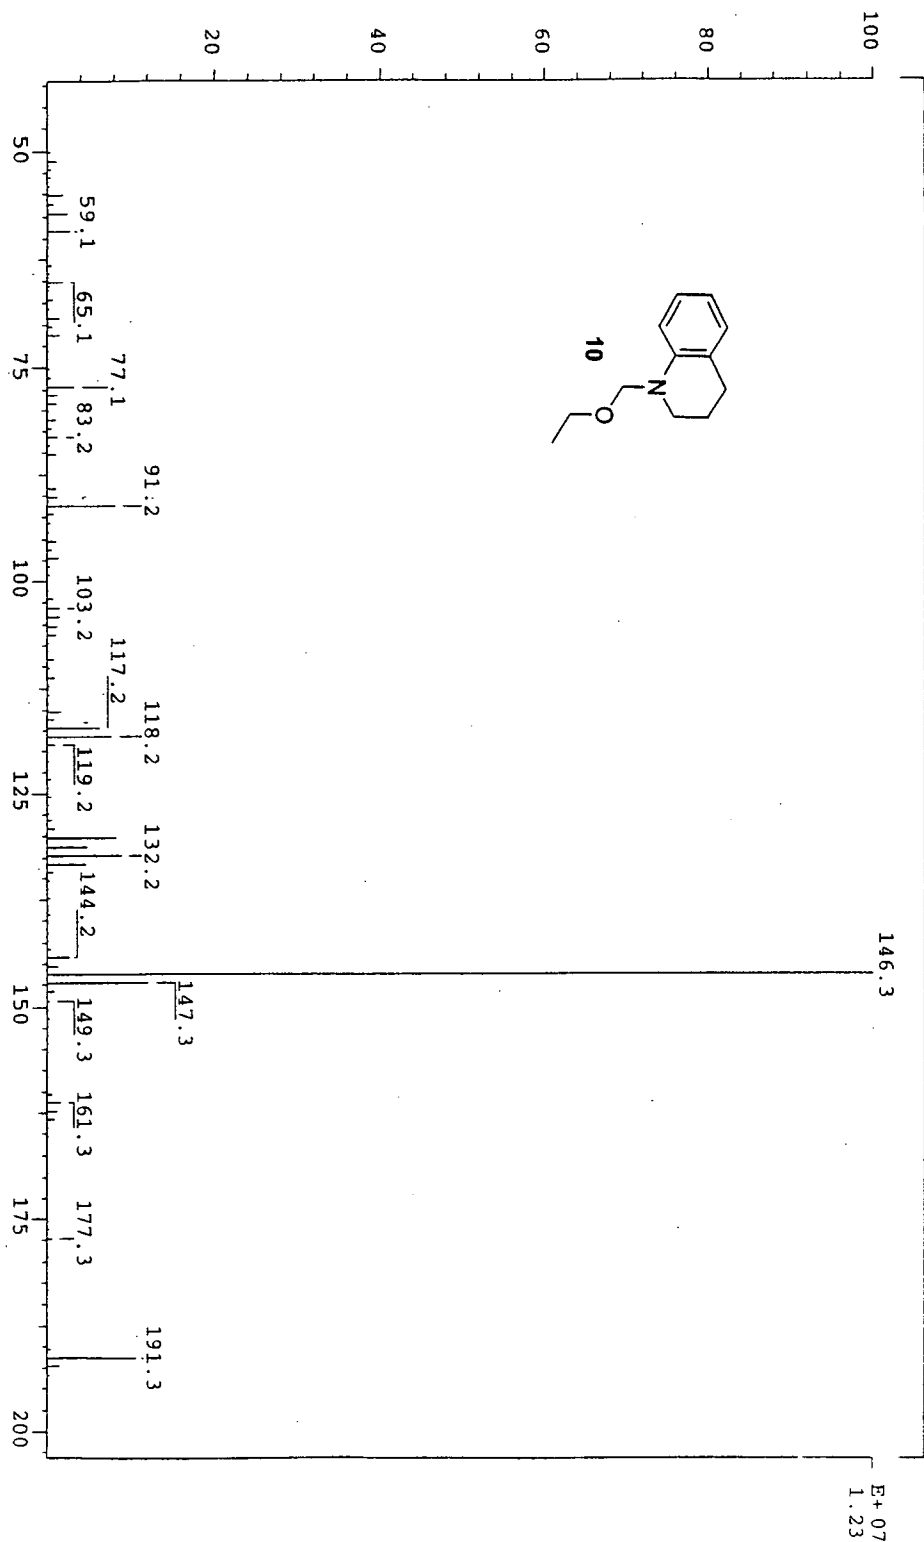

S11

LIST: hei-1150-c2 27-Feb-10 REG : 01:12.3 #9  
 Samp: EOM-THQ42 Start : 09:38:39 1167  
 Mode: EI +VE +LMR ESCAN (EXP) UP HR NRM  
 Oper: Inlet :  
 Limt: ( 0 )  
 : ( 541 ) C38.H41.O.N2  
 Peak: 1000.00 mmu R+D: -2.0 > 60.0  
 Data: +/259>328 (CMASS : converted; CMASS : converted |CMASS : conve

| Mass     | Intensity | %RA   | Flags | Delta | R+D | Composition |
|----------|-----------|-------|-------|-------|-----|-------------|
| 191.1309 | 375010    | 14.68 | #     | 0.1   | 5.0 | C12.H17.O.N |

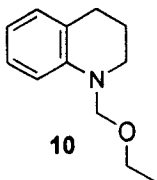

Supplement: Supplementary file 1 [file 5176897]
